# Supplementary material
Source: Springer Nature journal article supplement (https://www.springermedizin.de/resource/supplementary/13613_2012_132_MOESM2_ESM.pdf/12196282)
Supplement: MOESM2 [file 12196282]

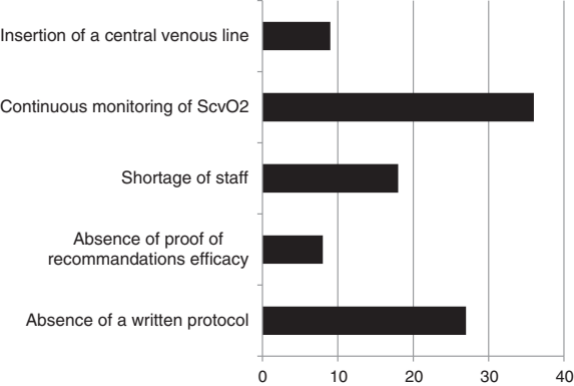

Insertion of a central venous line

Continuous monitoring of ScvO2

Shortage of staff

Absence of proof of  
recommandations efficacy

Absence of a written protocol

0

10

20

30

40
